1 Early vegetation recovery after the 2008-  
2 2009 explosive eruption of the Chaitén  
3 Volcano.

4  
5 Ricardo Moreno-González<sup>1\*</sup>, Iván A. Díaz<sup>2</sup>, Duncan A. Christie<sup>2,3</sup>, Rafael E. Coopman<sup>2,4</sup>,  
6 Antonio Lara<sup>2,3</sup>

7  
8 *1. Department of Palynology and Climate Dynamic, University of Göttingen, Germany.*

9 *2. Instituto de Conservación, Biodiversidad y Territorio, Universidad Austral de Chile,*  
10 *Valdivia, Chile.*

11 *3. Center for Climate and Resilience Research (CR)<sup>2</sup>*

12 *4. Marilyn Ball's Lab, Plant Science Division, Research school of Biology, The Australian*  
13 *National University*

14 \* Corresponding author: Ricardo Moreno González

15 E-mail: [rmoreno@uni-goettingen.de](mailto:rmoreno@uni-goettingen.de)

16

17

## 18 **Abstract**

19 In May 2008, Chaiten volcano entered in eruptive process, one of the world largest in the last  
20 time decades. The catastrophic event left different type of disturbance and caused diverse  
21 environmental damage. Consequently, the biological legacies were distributed heterogeneously  
22 in surrounding areas of the volcano. We went to the field to assess the early vegetation  
23 responses to the eruption a year after, September 2009. Particularly in the lateral-blast  
24 disturbance zone. We distributed a set of plots in three disturbed sites, and one in an undisturbed  
25 site. In each site, in a plot of 1000m<sup>2</sup> we marked all stand tree, recording whether they were  
26 alive, resprouting or dead. Later in 80 small-plots (~4m<sup>2</sup>) we tallied the plants regenerating, its  
27 coverage, and the log-volume. For regenerating plants, we described whether the substrate was  
28 mineral or organic. The impacts in the blast-zone created a gradient of disturbance, where close  
29 to the crater we found high devastation marked by the no surviving species, scarce standing-  
30 dead trees and logs, as well as no regeneration. On the other extreme, trees with devastated  
31 crown were resprouting, small-plants regrowing and dispersed seedlings. The main  
32 regeneration strategy was resprouting from trunks or buried roots, while few seedlings were  
33 observed in the small plots and elsewhere in disturbed areas. The main findings of this study  
34 are: i) a mosaic of pioneering-wind dispersed species, scattered survivors regrowing and  
35 spreading from biological legacies, and plant species dispersed by frugivorous birds, likely  
36 favored by the biological legacies; (ii) the early succession is influenced by the interaction of  
37 the species-specific life history, altitudinal gradient and the different intensity of disturbance.

38

39 **Keywords:** 2008-Chaiten Volcano, Volcanic disturbance, Nothofagus dynamics, South  
40 American temperate rainforest,

41

## 42 **1. Introduction**

43 Volcanic eruptions are large-scale disturbance that modify the composition, the structure and  
44 ecosystems processes (Swanson et al., 2013; Turner and Dale, 1998; Turner et al., 1997). As  
45 volcanoes enter in eruptive phase complex mechanism involve the events in a gradient of  
46 multiple type of disturbances such as explosive blasts, thermal and toxic chemical waves,  
47 landslides, glowing avalanche deposits, debris flows, lava flows, and air falls of volcanic tephra  
48 (Dale et al., 2005; Swanson et al., 2013). A volcanic eruption could have effects at very large  
49 spatial and temporal scales (Peet, 1992; Robock and Oppenheimer, 2003), yet directly on  
50 surrounded forest throughout burning, burying and/or blowing down trees or other plants (Dale  
51 et al., 2005). However, since this kind of large disturbance are infrequent (Turner et al. 1998)  
52 or have been seldom monitored (Chrisafully and Dale, 2018), our understanding of vegetation  
53 responses is still limited. Despite the importance of volcanic eruptions, few studies have  
54 analyzed the effect of eruptions short after the event (Dale et al., 2005; Chrisafully and Dale  
55 2018). On the other hand, the effect of volcanism has been studied by comparing different  
56 stands in chronosequences assuming that different forest patches would reflect the successional  
57 stage after the disturbance (e.g. Drury and Nisbet 1973; Franklin and Swanson, 2010; Pickett  
58 1988; Walker et al 2010).

59

60 Forest recovery is considerably slow following disturbances that heavily impact soils as well  
61 as aboveground vegetation (Chazdon, 2003). Despite volcanoes are considered as catastrophic  
62 disturbance event, it is possible that diverse biological legacies can remain after the event. The  
63 persistence and heterogeneous distribution of these biological legacies might modulate and help  
64 the recolonization of the plants (Foster et al., 1998; Franklin et al., 1985; Turner et al., 1998).  
65 For example, the life-history traits of the pre-disturbed community will result in particular  
66 survivors perhaps able to re-colonize and expand over the new conditions on the disturbed

67 environment (Foster et al., 1998; Turner et al., 1998). The arrange and the amount of the  
68 biological legacies would drive the rate, and the pathways of the new colonizers.

69

70 One of the most active tectonic and volcanic areas in the world correspond to the subduction  
71 area of the Nazca and the South American plate (e.g., Stern, 2004), which also originated the  
72 longest and the second highest mountain range in the world, the Andes. The Chilean Andes are  
73 quite volcanically active where the Southern and Austral Volcanic Zones of the Andes comprise  
74 74 active volcanoes since the Post-Glacial, and at least 21 of these have had one or more large  
75 explosive eruptions (Fontijn et al., 2014). In the southern portion of the Andes are located the  
76 South American Temperate rainforest (SATR), particularly in southern Chile and westernmost  
77 Argentina (Armesto et al., 1998). This cordillera plays a critical role in SATR dynamics where  
78 current successional models are dominant pioneering trees after volcanic disturbance (Veblen  
79 et al., 2016). The SATR represent a biogeographical island, rich in endemic species and  
80 dominated by evergreen, broad-leaved species (Armesto et al., 1996; Villagran and Hinojosa,  
81 1997, Arroyo et al., 2004). South of 40°S, extensive areas of old-growth forest dominate the  
82 mountainous landscape. These forest are not directly disturbed by modern human activity, and  
83 represent one of the last pristine areas with pre-industrial biogeochemical conditions (Perakis  
84 and Hedin 2002)

85 On May 1<sup>st</sup> 2008 started the last eruption of the Chaiten Volcano (42° 50'S), near the small  
86 town of Chaiten, in southern Chile. This eruption was the largest rhyolite eruption since the  
87 great eruption of Katmai Volcano in 1912, being the first rhyolite eruption in which some  
88 attributes of its dynamics and impacts have been monitored (Major and Lara, 2013). The  
89 eruption consisted of an approximately 2-week-long explosive phase that generated as much as  
90 1 km<sup>3</sup> bulk volume tephra (~0.3 km<sup>3</sup> dense rock equivalent) followed by an approximately 20-

91 month-long effusive phase that erupted about 0.8 km<sup>3</sup> of high-silica rhyolite lava that formed a  
92 new dome within the volcano's caldera (Major and Lara, 2013). Chaiten volcano was  
93 surrounded by extensive old-growth undisturbed forest by humans, providing a unique  
94 opportunity to evaluate the effects of volcanism over undisturbed landscape, then providing an  
95 opportunity to understand how volcanism may have affected the forest, under pre-industrial  
96 conditions.

97

98 In this study, we characterized the early establishment of the vegetation after the eruption of  
99 the Chaitén volcano along a disturbance gradient one year after the eruption started, from  
100 nearby the crater to the closest old-growth forest with vegetation completely alive. We predict  
101 that plant species diversity and the number of living trees decrease close to the crater, and  
102 pioneering *Nothofagus* species are colonizing the areas affected by the eruption. Our objectives  
103 included the creation of a baseline for further long-term monitoring of vegetation recovering,  
104 and to identify and analyze the importance of biological legacies for forest recovery.

105

## 106 **2. Material and methods**

### 107 **2.1 Study site**

108

109 The Chaitén volcano is located in the west side of the Andean Range in southern Chile, at 42°  
110 50' S and 72° 39' W (Fig 1) and is part of the so-called Southern Volcanic Zones. The Chaitén  
111 Volcano is a dome of 1100 m height, located at 10 km NW of the town of Chaitén, populated  
112 by approximately 5000 inhabitants before the eruption. The climate of the area corresponds to  
113 a humid temperate with a strong oceanic influence (Luebert and Plissock, 2006). The landscape  
114 is characterized by sharp mountains shaped by glaciers and valleys originated by fluvial and

115 glacio-fluvial outwash (Swanson et al., 2013). Vegetation within the influence area of the  
116 Chaiten volcano is dominated by a dense old-growth temperate rainforest of northern  
117 Patagonian and Valdivian types (Luebert and Plischoff, 2006; Swanson et al., 2013; Veblen et  
118 al., 1983; Veblen et al., 1996). These forests composition is dominated by broad-leaved  
119 evergreen trees such as *Nothofagus dombeyi* (Mirb.) Oerst. (Nothofagaceae), *Laureliopsis*  
120 *philippiana* (Looser) Schodde, *Gevuina avellana* (Molina), *Amomyrtus luma* (Molina) D.  
121 Legrand and Kausel, *Luma apiculata* (DC.) Burret, *Drymis winteri* J.R. Forst. and G. Forst.,  
122 *Eucryphia cordifolia* Cav. and *Weinmannia trichosperma* Cav. (both Cunoniaceae). These  
123 species are normally arranged in multi-layered canopy strata and old, large-emergent trees (up  
124 to c. 40 m height) and abundant snags and logs. The understory is densely covered by ferns  
125 such as *Lophosoria quadripinnata* (J.F.Gmel.) C.Chr. and *Blechnum magellanicum* (Desv.)  
126 Mett., seedlings, saplings and bamboo tickets (*Chusquea* spp.).

127

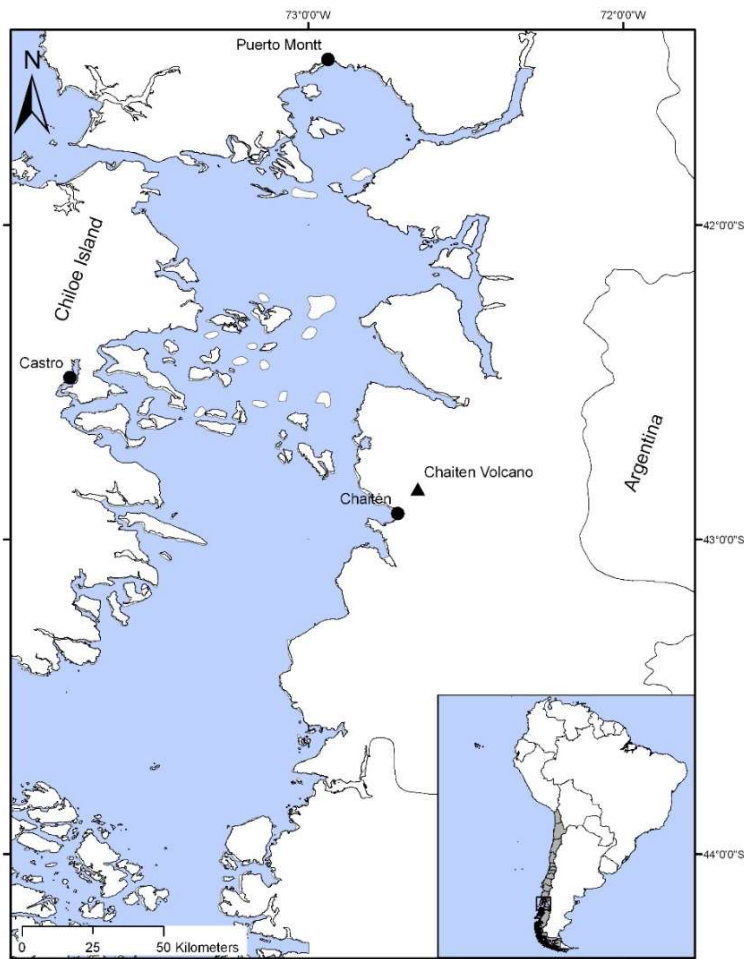

Figure 1. Study area.

128

129

## 130 **2.2 Study design**

131 We carried out the field work in September 2009. We first conducted a general inspection of  
132 the study area (del Moral, 1981). Later, we selected four sites with different degrees of volcanic  
133 impact following similar classifications of previous studies (del Moral, 1981). The first site  
134 corresponds to a forest with low volcanic impact that only received few millimeters of tephra  
135 deposition. This site was called “Old-growth forest”. It was located 5 km from the center of the

136 new dome at an elevation of 600 m a.s.l. (Figure 1b). The second site was characterized by the  
137 presence of abundant dead standing trees, and higher tephra deposition. This site was called  
138 “Standing-dead” located at 3.5 km from the center of the new dome, at 160 m. The third site  
139 was more affected by the eruption, and was characterized by high tephra deposition, where most  
140 trees were broken and throw down by the eruption. This site was called “Blow down” and was  
141 located at 2.3 km from the center of the new dome at an elevation of 300 m a.s.l. Finally, the  
142 fourth and most affected site was in the border of the crater, at 1.5 km of the center of the new  
143 dome and at 750 m a.s.l. This site presented the higher tephra deposition and all trees were blow  
144 down by the eruption and heavily buried under volcanic ash. This site was called “Total  
145 destruction”.

146

147 In each one of these four areas was installed a 50 x 20 m permanent plot where we  
148 measured the diameter at the breast height (dbh) of all trees  $\geq 5$ cm. Every tree was identified at  
149 the species level when possible and marked. We registered if the stems were alive, resprouting  
150 after the eruption, or snag (standing dead). To estimate the presence and abundance of tree  
151 regeneration, we traced four transects of 120 m long. Transects were distributed parallel,  
152 separated 20 m from each other. In each transect, we mounted five circular plots of 1.5m radius  
153 ( $4.71\text{m}^2$ ) every 30 m. On these plots we counted all seedlings and saplings present, and  
154 recording the substrate where they rooted (forest soil, logs, or volcanic tephra). We registered  
155 other non-tree plant species in the circular plots, estimated its abundance as the relative cover,  
156 and we also recorded the substrate where they rooted were organic or mineral (e.g., forest soil,  
157 logs, or volcanic tephra). We assessed the volume of all exposed logs in the plot, until each  
158 border within the plot. Assuming a cylindrical form of each log, we calculated the volume of



159 logs present inside the plot and standardizing its measurements to m<sup>3</sup> of logs per m<sup>2</sup> of plot  
160 surface.

161

## 162 **2.3 Data Analysis**

163 Trees seedlings, herbs and shrubs species richness was compared among sites using rarefaction  
164 analysis (Colwell 2006). Rarefaction curves allow for comparing species richness among  
165 environments avoiding the bias in the number of species detected due to the increased  
166 probability of species detection in areas where individuals were more abundant, by plotting the  
167 number of species detected in function of the number of individuals observed (Colwell and  
168 Coddington, 1994, Gotelli & Colwell 2011, Colwell et al., 2012). This procedure includes  
169 Monte Carlo simulations delivering an average value of species richness with a confidence  
170 interval of 95% (Colwell 2006). Rarefaction analyses were conducted using the software  
171 EstimateS Win 8 (Colwell 2006). Non-vascular species were excluded from the rarefaction  
172 analyses since not all of them were classified up to the species level, and one genus could  
173 include several species. Plant composition among sites was compared using Sørensen's  
174 similarity index based on the presence/absence of plant species. Rarefaction and similitude  
175 analyses were both carried out with the software Estimates 8.2 (Colwell 2006). In attempting  
176 to define if the plant composition of one site was a subset of the composition of other site, we  
177 conducted a Nested Analysis in NestCalc free access software (Atmar and Patterson, 1995).

178

## 179 **3. Results**

### 180 **3.1 General description of the effects of the eruption**

181 The eruption of the Chaitén volcano has an impressive effect on the forest. The eruption in the  
182 study area produced a gradient of destruction. Around the crater all the trees were blown down

183 and heavily buried by tephra. Other trees were partially buried, broken in half, with the trunks  
184 covered with impacts of many little stones looking similar to the fire of gun shots (Fig x).  
185 Moving away and down from the crater, trees were blown down and densely covered by ash(Fig  
186 x), while further away trees were standing dead presenting progressively finer branches(Fig x).  
187 Many small patches of the organic litter were exposed and sparsely distributed and protected  
188 from the direct effect of the eruption by root discs and large trunks, or were exposed by small  
189 ravines that flush away the volcanic ash. These small patches looked like clumps of organic  
190 soil, with roots of ferns and other small plants that were not buried by the tephra. These clumps  
191 were covered by plants that survived in the area affected by the eruption, and their frequency  
192 increases when moving away from the crater towards the undisturbed forests.  
193

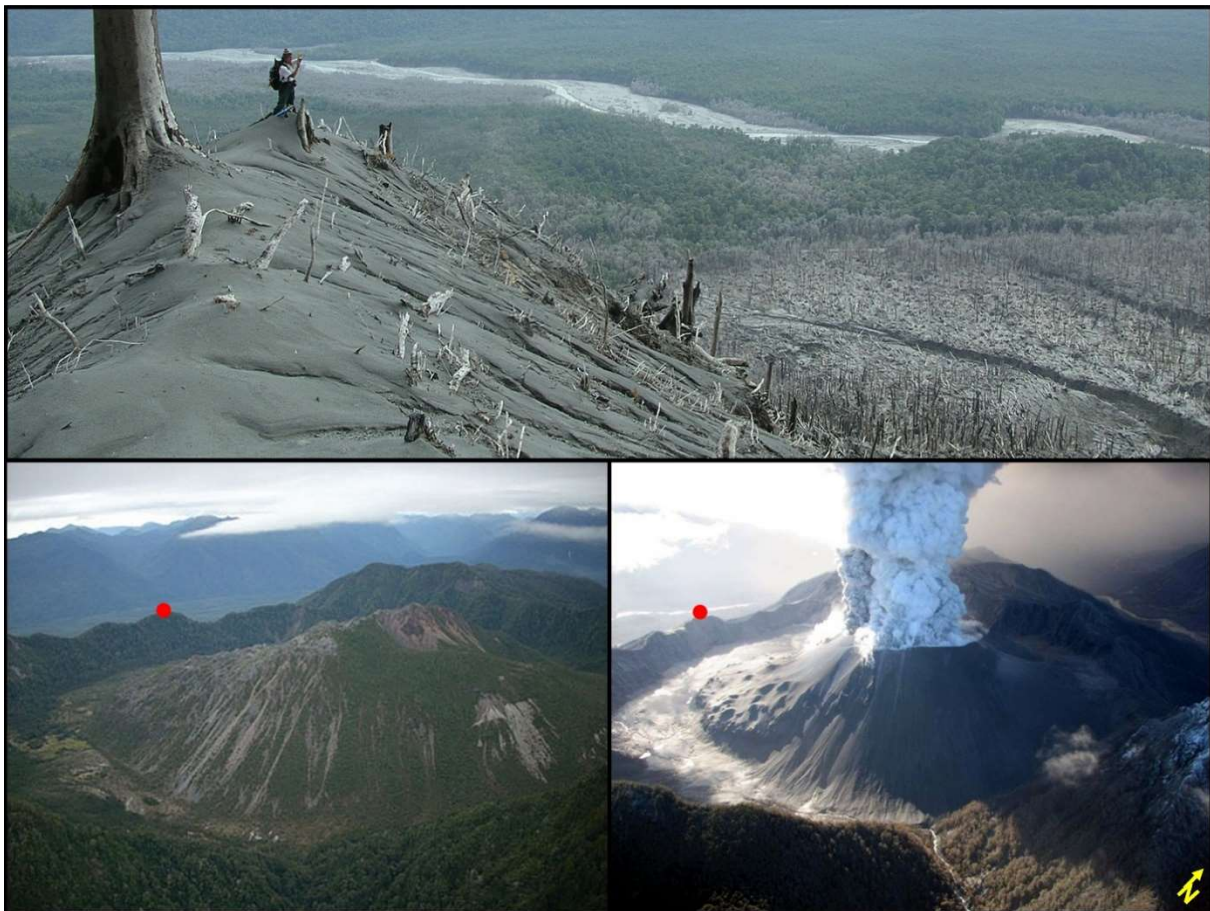

*Figure 2. Upper panel showing impressive impacts close to the crater. Comparison of the volcanic dome and vegetation cover before (bottom-left panel) and during the 2008-2009 eruption (bottom-right panel).*

194 In the surrounding, we did not observed evidence of fire caused by the eruption, but the trunk  
195 and bark of several trees looked charred within the influence area. Trees were dead and dry by  
196 the eruptive explosions, but some trees in Blow-down and Standing-dead areas maintained the  
197 bark in the opposite side of the crater, perhaps with possibilities to resprouting hereafter. Tephra  
198 buried the fallen trees in the whole study area, but principally in Blow-down and Total-  
199 destruction areas. Tephra was very compacted, seeming as pavement that covered the fallen  
200 forests. Heterogeneous tephra deposition exposed some trunks, clumps and remnants with  
201 organic-forest soil likely from the original forest. Shrubs and epiphytes were spread everywhere  
202 in the Standing-dead area. Ferns, bamboo and tree seedlings were growing in remnants of  
203 exposed organic soil, usually below or at one side of trunks or unearth roots. Surviving trees  
204 also increases when moving away and down from the crater.

205

### 206 **3.2 Species composition**

207 We found 10 species of trees in the area, and 50 species of smaller plants, including seedlings,  
208 herbs and ferns (Table 1). Rarefaction analysis for tree species showed that the Standing-dead  
209 plot holds one more species than the Old-growth forest plot (Fig. 3). This same analysis showed  
210 the Blow-down plot holds very few individuals, but the initial slope and shape of the curve was  
211 similar to the other two curves. It indicates that at similar number of individuals, all curves  
212 showed a similar number of tree species. Rarefaction analysis of small vascular plants showed  
213 the Old-growth forest site had the richest species composition, while decreasing in the Standing  
214 dead and Blow-down plots (Fig. 3). The Total-destruction plot showed practically no species.

215

Table 1. List of plant species present in the Chaitén volcano and their frequency in the big plot and in 20 plots of 3.14m<sup>2</sup> in the different studied areas.

| Families                      | Species                         | Old-growth | Standing dead | Blow-down | Near crater |
|-------------------------------|---------------------------------|------------|---------------|-----------|-------------|
| <b>SEEDLINGS</b>              |                                 |            |               |           |             |
| Cunoneaceae                   | <i>Weinmannia trichosperma</i>  |            | 2             |           |             |
|                               | <i>Caldcluvia paniculata</i>    | 4          | 4             |           |             |
| Eucryphiaceae                 | <i>Eucryphia cordifolia</i>     | 5          |               |           |             |
| Flacourtiaceae                | <i>Azara lanceolata</i>         |            |               | 1         |             |
| Monimiaceae                   | <i>Laureliopsis philippiana</i> | 6          |               |           |             |
| Podocarpaceae                 | <i>Podocarpus saligna</i>       | 1          |               |           |             |
| Winteraceae                   | <i>Drimys winteri</i>           | 3          |               |           |             |
| Proteaceae                    | <i>Embothrium coccineum</i>     |            | 1             | 4         |             |
|                               | <i>Lomatia ferruginea</i>       | 5          |               |           |             |
|                               | <i>Gevuina avellana</i>         | 1          |               |           |             |
| Myrtaceae                     | <i>Myrceugenia parviflora</i>   | 3          |               |           |             |
|                               | <i>Myrceugenia planipes</i>     | 12         |               |           |             |
|                               | <i>Amomyrtus luma</i>           | 16         | 4             |           |             |
| Araliaceae                    | <i>Raukaua laetevirens</i>      | 3          |               |           |             |
| <b>HERBS AND SMALL SHRUBS</b> |                                 |            |               |           |             |
| Gesneraceae                   | <i>Mitraria coccinea</i>        | 8          |               |           |             |
|                               | <i>Asteranthera ovata</i>       | 1          | 1             |           |             |
|                               | <i>Campsidium valdivianum</i>   | 5          |               |           |             |
| Poaceae                       | <i>Chusquea uliginosa</i>       | 7          | 1             | 1         |             |
| Apocinaceae                   | <i>Elytropus chilensis</i>      | 6          | 1             |           |             |
| Fitolaceae                    | <i>Ercilla syncarpellata</i>    | 3          |               |           |             |
| Saxifragaceae                 | <i>Ribes magellanicum</i>       |            | 1             |           |             |
| Bromeliaceae                  | <i>Greigia landbeckii</i>       | 4          |               |           |             |
| Griselineaceae                | <i>Griselinia racemosa</i>      | 1          |               |           |             |
|                               | <i>Griselinia ruscifolia</i>    | 4          | 1             | 1         |             |
| Gunneraceae                   | <i>Gunnera tinctoria</i>        |            |               | 1         |             |

|                      |                                      |            |           |           |
|----------------------|--------------------------------------|------------|-----------|-----------|
| Rubiaceae            | <i>Nertera granadensis</i>           | 1          |           |           |
| Hydrangeaceae        | <i>Hydrangea serratifolia</i>        | 12         |           |           |
| Luzuriagaceae        | <i>Luzuriaga poliphylla</i>          | 8          | 1         | 1         |
|                      | <i>Luzuriaga radicans</i>            | 14         |           |           |
| <hr/>                |                                      |            |           |           |
| <b>FERNS</b>         |                                      |            |           |           |
| Dicksoniaceae        | <i>Lophosoria quadripinnata</i>      | 6          | 4         | 3         |
| Hymenophyllaceae     | <i>Hymenophyllum tortuosum</i>       |            |           | 2         |
|                      | <i>Hymenophyllum magellanicum</i>    | 2          |           |           |
|                      | <i>Hymenoglossum cruentum</i>        | 6          |           |           |
|                      | <i>Hymenophyllum caudiculatum</i>    | 3          |           |           |
|                      | <i>Hymenophyllum cuneatum</i>        | 2          |           |           |
|                      | <i>Hymenophyllum dentatum</i>        | 5          |           |           |
|                      | <i>Hymenophyllum dicranotrichium</i> | 12         |           |           |
|                      | <i>Hymenophyllum krauseanum</i>      | 5          |           |           |
|                      | <i>Hymenophyllum pectinatum</i>      | 3          |           |           |
|                      | <i>Hymenophyllum plicatum</i>        | 3          |           |           |
|                      | <i>Serpillopsis caespitosa</i>       | 5          |           |           |
| Aspleniaceae         | <i>Asplenium daeroides</i>           | 4          |           |           |
|                      | <i>Pleurosorus papaverifolius</i>    | 4          |           | 3         |
| Dryopteridaceae      | <i>Megalastrum spectabile</i>        | 7          |           |           |
| Blechnaceae          | <i>Blechnum mochaenum</i>            | 1          |           |           |
|                      | <i>Blechnum arcuatum</i>             | 1          |           |           |
|                      | <i>Blechnum chilense</i>             | 2          | 1         | 1         |
|                      | <i>Blechnum magellanicum</i>         | 1          |           |           |
| Dennstaedtiaceae     | <i>Hypolepis rugosula</i>            |            |           | 1         |
| <hr/>                |                                      |            |           |           |
| <b>Total general</b> |                                      | <b>201</b> | <b>22</b> | <b>20</b> |
| <hr/>                |                                      |            |           |           |

216

217

218

219

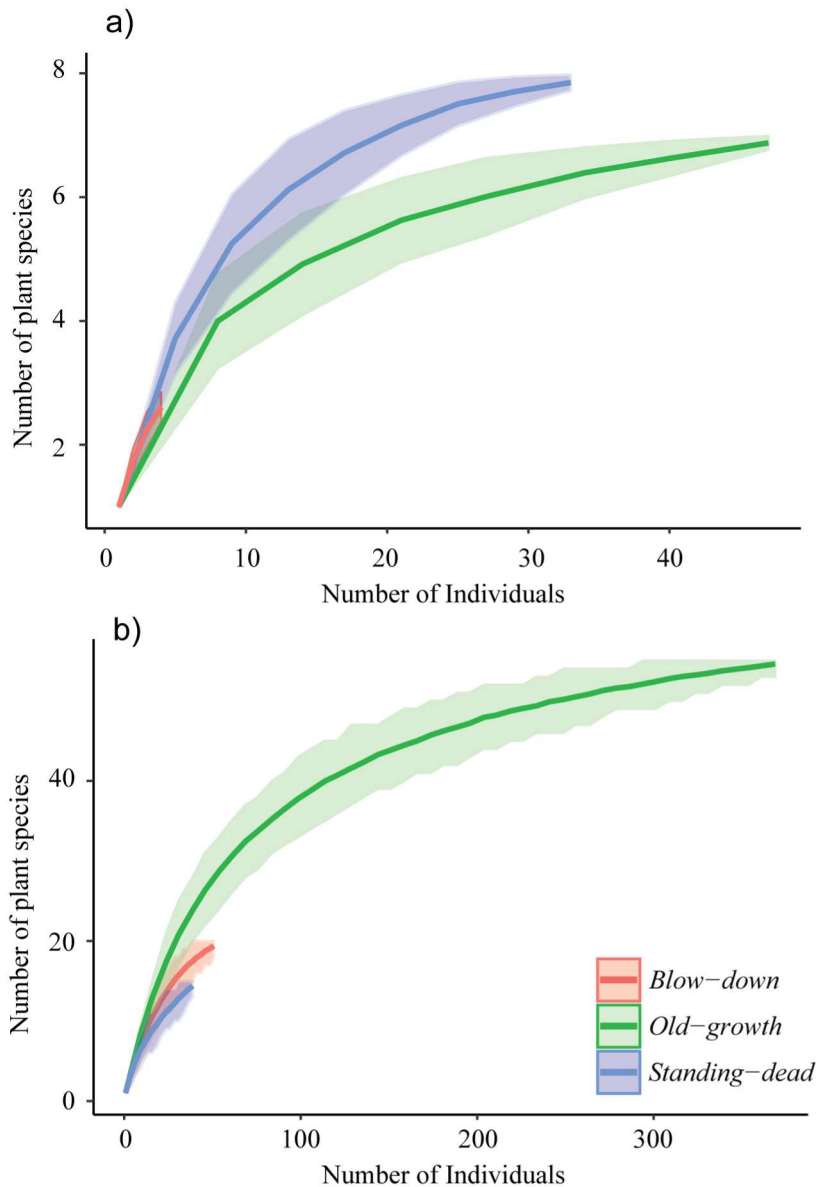

*Figure 3. Rarefaction analysis showing the relationship between number of tree seedlings species (a) and small vascular plant species (b) as function of the number of individuals. Both panel the shaded area is indicating one standard error). All sites affected by the eruption of Chaitén Old-growth, Standing-dead and Blow-down are compared, except Total-destruction was not included because of the absence of plants.*

220

221 Plant composition among Old-growth and Standing-dead plots showed some similarities (34%),

222 but less related with Blow-down (20%) and the Total-destruction plot (0%). Standing-dead and

223 Blow-down plots showed the highest similarities in species composition (Table 2). In the

224 disturbed plots, the plant species recorded were a subgroup of the species present in the Old-  
225 growth forest plot (Nestedness calculator  $T=13.85^\circ$ ). The most frequent plant was the fern *L.*  
226 *quadripinnata* that survived the direct impact of the eruption in small clumps of organic matter  
227 protected by trunks or root disc of trees, and were not completely covered by tephra. Bamboo  
228 and ferns were sprouting from roots in the remnants of exposed forest soil.  
229

*Table 2. Sørensen similarity index for the plant composition among the different sites in the Chaitén influence area.*

| Site              | Old-growth | Standing dead | Blow down | Total destruction |
|-------------------|------------|---------------|-----------|-------------------|
| Old-growth        | 1          |               |           |                   |
| Standing dead     | 0.342      | 1             |           |                   |
| Blow down         | 0.2        | 0.526         | 1         |                   |
| Total destruction | 0          | 0             | 0.1       | 1                 |

230

### 231 **3.3. Forest structure**

232 The forest structure of the Old-growth site showed individuals of all sizes, with several large  
233 emergent trees (Fig. 4). Most trees in the Old-growth plot were alive and the snags most  
234 probably represent trees that died before the eruption, while in the other plots most trees were  
235 killed by the eruption. The Standing-dead plot showed similar dbh distribution than the Old-  
236 growth plot, with higher frequency of small dbh. The Blow-down plot showed a very small  
237 number of standing trees, concentrated in intermediate size class, while the Total-destruction  
238 plot practically had no individual standing trees (Fig. 4).

239

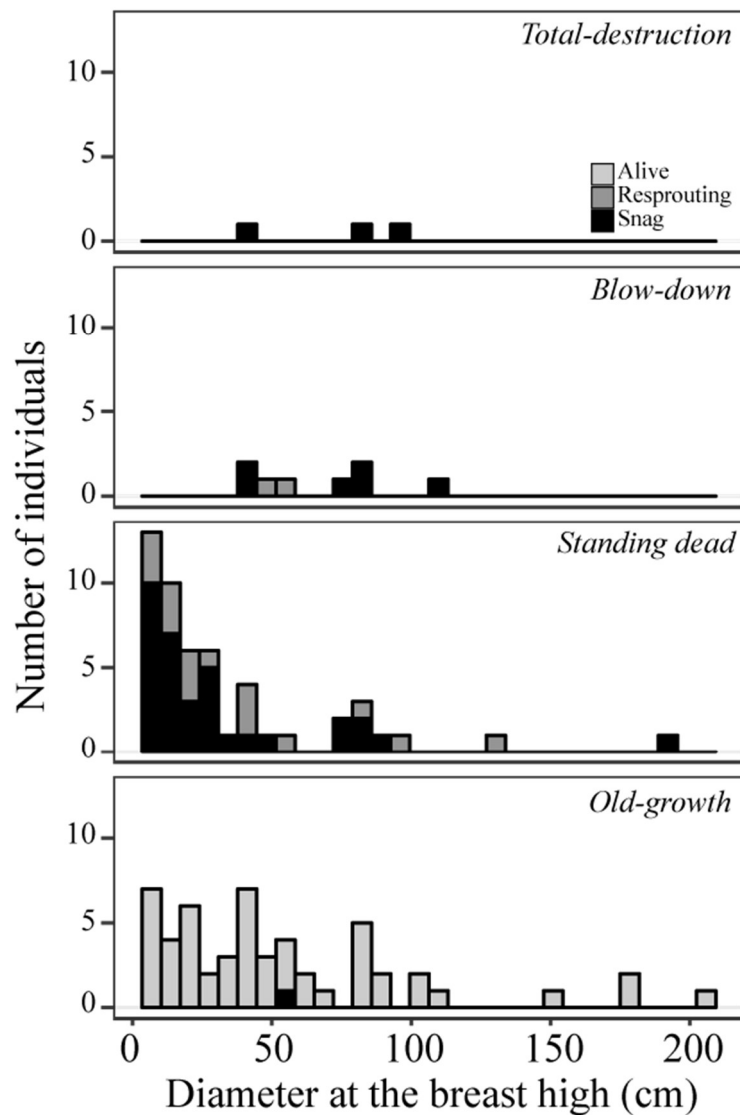

240

Figure 4. Diameter at the breast height (dbh) distribution for living and standing dead trees in the study sites influenced by the eruption of the Chaitén volcano.

241

242 The basal area of the Old-growth plot was dominated by *L. philippiana*, followed by *E.*  
243 *cordifolia* and *C. paniculata* (Table 3). In the Standing-dead and Blow-down plots *W.*  
244 *trichosperma* and *N. dombeyi* were the dominant components of the basal area, but also with a  
245 high number of unidentified trees (Table 3). We were not able to identify the species of the



246 standing dead trees in the Total destruction plot. The volume of fallen trees increased in the  
 247 Blow-down and in Standing-dead plots, but it was much lower in the Old-growth and the Total-  
 248 destruction plots (Fig. 5). In the Total-destruction plot most logs were heavily buried by a dense  
 249 tephra layer.  
 250

*Table 3. Total basal area in 1000 m<sup>2</sup> of tree species of the study plots in the Chaitén volcano area, classified as alive, resprouting after the eruption, or snag*

|                                 | <b>Total-destruction</b> | <b>Blow-down</b> |             | <b>Standing-dead</b> |             | <b>Old-growth</b> |              |
|---------------------------------|--------------------------|------------------|-------------|----------------------|-------------|-------------------|--------------|
|                                 | Snag                     | Snag             | Resprouting | Snag                 | Resprouting | Snag              | Alive        |
| <i>Amomyrtus luma</i>           |                          |                  |             | 0,02                 | 0,34        |                   | 0,47         |
| <i>Amomyrtus meli</i>           |                          |                  |             |                      | 0,06        |                   |              |
| <i>Caldcluvia paniculata</i>    |                          |                  |             |                      |             |                   | 2,54         |
| <i>Drimys winterii</i>          |                          |                  |             | 0,14                 |             |                   |              |
| <i>Lomatia ferruginea</i>       |                          |                  |             | 0,,04                | 0,01        |                   | 0,02         |
| <i>Myrceugenia planipes</i>     |                          |                  |             |                      |             |                   | 0,84         |
| <i>Eucryphia cordifolia</i>     |                          | 0,55             |             | 0,59                 | 0,61        | 0,26              | 6,37         |
| <i>Laureliopsis philippiana</i> |                          | 0,25             |             | 0,87                 |             |                   | 9,64         |
| <i>Nothofagus dombeyi</i>       |                          |                  |             | 3,46                 |             |                   |              |
| <i>Weinmannia trichosperma</i>  |                          | 0,95             | 0,41        |                      | 2,38        |                   | 0,71         |
| <i>not identified</i>           | 1,41                     | 0,94             |             | 1,45                 |             |                   |              |
| <b>Total</b>                    | <b>1,41</b>              | <b>2,69</b>      | <b>0,41</b> | <b>6,57</b>          | <b>3,39</b> | <b>0,26</b>       | <b>20,59</b> |

251

252

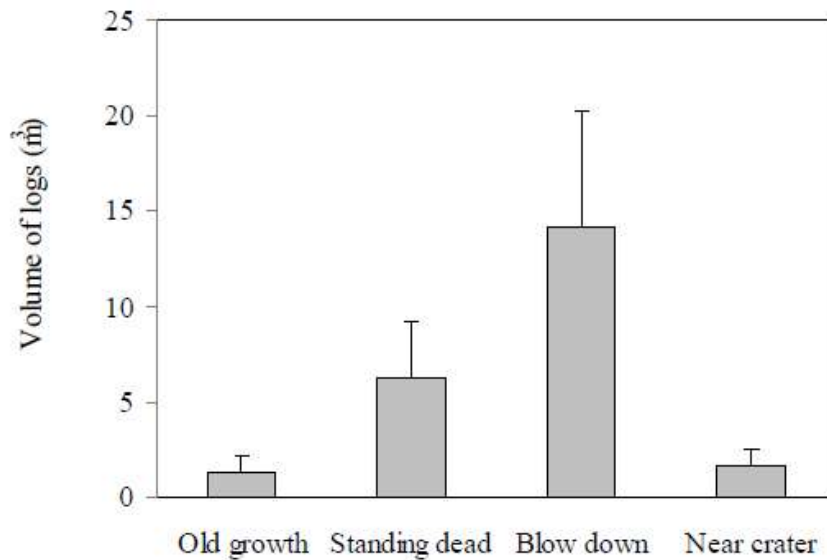

Figure 5. Volume of fallen dead trees (logs) in the study sites influenced by the eruption of the Chaitén volcano in the study sites.

253

### 254 **3.4. Seedlings and small plants**

255 We found a total of 90 seedlings from 5 trees and shrubs species in the disturbed plots, while  
256 we registered 174 seedlings of 12 species in Old-growth plots. The Standing-dead plots had 83  
257 seedlings from five species, while the Blow-down plots presented 7 seedlings from two species.  
258 We did not find any seedling in the total destruction plot. In the Old-growth plots, seedlings  
259 were largely dominated by the shade tolerant *A. luma*, *M. parviflora* and *M. planipes*. In the  
260 Standing-dead plots, seedlings were dominated by *C. paniculata* (48% of the total), but also  
261 present the shade-tolerant tree *A. luma* (24%), the pioneer tree species *W. trichosperma* and *E.*  
262 *coccineum* (18% and 8% respectively). In the Blow-down plot, *E. coccineum*, a pioneer species,  
263 and *A. lanceolata* were the only recorded species.

264 We found different mechanism of forest regeneration in the plots. In the Old-growth plot most  
265 regeneration was from seeds, while in the Standing-dead plots most regeneration become from

266 resprout and few tree seedlings from seeds (Table 4). In the Old-growth plots, most of the tree  
267 seedlings corresponded to species with fleshy fruits dispersed by birds, while in the Standing-  
268 dead plots most seeds were wind-dispersed. In the Blow-down plots, all seedlings came from  
269 seeds (Table 4), but a half of the seedlings corresponded to species dispersed by birds (e.g.  
270 *Ribes magellanicum*) and the other half were species dispersed by wind (e.g. *E. coccineum*).  
271 Second, in all plots most seedlings were growing on organic substrata (Table 4), such as organic  
272 soil on the ground, root discs and logs, while few seedlings were growing directly either on the  
273 tephra or on the rocks. In the Blow-down plot we found 7 seedlings of *E. coccineum*, growing  
274 just in remnants of organic litter; in Standing-dead plot 11 seedlings growing directly in the  
275 tephra, while the other 72 seedlings were resprouting directly from the standing tree's trunks.  
276 In the Old-growth plots we found just one species growing in an exposed rock while the rest of  
277 the seedlings were growing in organic substrates (Table 4).  
278

Table 4. Number of seedlings per regeneration type and substratum type in the plots.

|                   | Regeneration type |      | Substratum type |         |
|-------------------|-------------------|------|-----------------|---------|
|                   | Resprouting       | Seed | Mineral         | Organic |
| Total-destruction | -                 | -    | -               | -       |
| Blow-down         | -                 | 7    | -               | 7       |
| Standing-dead     | 74                | 9    | 11              | 72      |
| Old-growth        | 31                | 127  | 1               | 157     |

279

280

281 Other small plant species in the studied plots (Table 1) showed differences along the disturbance  
282 gradient (Table 2). For example, the Old-growth plot has species in all categories of plant cover,  
283 with few species covering over 75% of the ground, and many species covering between 1-5%  
284 (Fig. 6). In contrast, Standing-dead and Blow-down plots were covered by fewer species, and

285 concentrated in the lower ranges of coverage (Fig. 6). In the Total destruction plot we only  
286 found a non-vascular plant (*Marchantia* sp.) with a cover between 5-25 % (Fig. 6) growing on  
287 a log exposed to the surface. The dominant understory species in the Old-growth forest were  
288 the bamboo *Chusquea* spp. and the fern *L. quadripinnata*. These species were also present in  
289 the Standing-dead and Blow-down plots, although scattered and with a low percent of coverage  
290 in the disturbed plots.

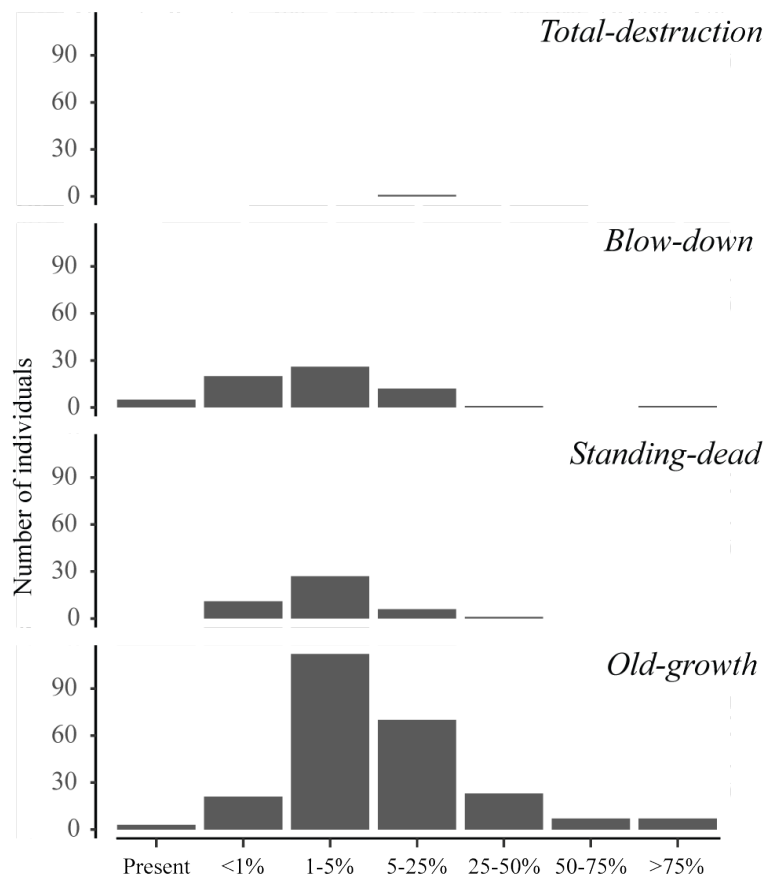

Figure 6. Plant cover (including vascular and non-vascular species) at the ground level of the study areas affected by the Chaitén volcano.

## 292 **4. Discussion**

### 293 **4.1 Early vegetation establishment: the relevance of biological legacies**

294 Few studies have been conducted short after an eruption in the southern Andes, however  
295 successional model predict that disturbed areas in low and mid altitude (<1000 m a.s.l.) forests  
296 would be dominated by *Nothofagus* species due to the shade-intolerance (e.g. Veblen and  
297 Ashton, 1978). However, in this study after the first year we did not register *Nothofagus* species  
298 despite were abundant in the surroundings non disturbed areas. It might be due to cyclic seed  
299 production with not constant seed rain along the years (Donoso, 1993; Veblen, 1985), and the  
300 short-term and limited spatial extension we were able to monitor the vegetation. However, our  
301 results pointed that regeneration occurs mainly due to an *in situ* development of plants  
302 associated to biological legacies such as logs, soil clumps and individuals that survive to the  
303 eruption. Other areas disturbed by Chaiten volcano presented similar patterns of types and  
304 abundance of biological structures (Swanson et al., 2013).

305

306 The initial establishment of the tree species, beside of the disturbance gradient, may be  
307 influenced by the interaction between life history of the species and the altitudinal gradient.  
308 Life history attributes such as seed dispersal, flowering phenology, growth form, resprouting  
309 ability or light-temperature stress resistance are a mechanism that influence the recovery  
310 response of the post-disturbance vegetation (Eriksson 2000; McIntyre et al., 1994; McLachlan  
311 and Bazely, 2001; Pausas and Lavorel, 2003; Tilman, 1997). In the disturbed plots, the principal  
312 mechanism of regeneration was the resprouting capability of some species (Tables 1 and 4).  
313 This is a frequent strategy in many plant species in response to disturbances of different types  
314 and intensities (Bellingham and Sparrow, 2000; Bond and Midgley, 2001). The seed dispersion  
315 syndrome could be also an important mechanism that influence the colonization after  
316 disturbance. Chilean forests have one of the highest proportions of plant dispersed by

317 frugivorous birds compared to other temperate rainforests (Armesto et al. 1987, Willson et al.,  
318 1996). Birds consume a high proportion of fruits and may disperse the seed to specific places,  
319 such as to a perch (Armesto et al., 2001; Lindenmayer and Franklin, 2002). The seed availability  
320 might increase in sites where remnant snags, shrubs or perching trees were available (e.g.,  
321 Bustamante-Sánchez, 2011). Finally, among the wind dispersed seeds, we only found seedlings  
322 of *E. coccineum* in disturbed plots. While this tree is adapted to stressful condition, the seed is  
323 able to disperse for long-distances (Donoso, 2006).

324

325 For non-tree species, Old-growth plot had more species than Standing-dead plot. On the  
326 contrary, for tree species Standing-dead plot is richest than Old-growth, revealing the effect of  
327 the eruption on the small plant species. On the other hand, in Blow-down and in Total-  
328 destruction plot, i.e. from mid to high disturbance intensity at mid to high altitude, and without  
329 or sparse biological legacies, we found low species richness and coverage, and sparse tree  
330 regeneration. This mosaic of legacies in the landscape offers opportunities for the  
331 recolonization of many different species in the affected area. The different species composition  
332 would promote different pathways to early succession with different communities, but also  
333 different recovery rates. We propose that in low to mid elevation areas, the vegetation recovery  
334 will be faster, dominated by species shade-tolerant to semi-tolerant and dispersed by birds,  
335 mostly due to biological legacies. On the other hand, at higher altitude, the vegetation recovery  
336 would be slower, recolonization made by shade-intolerant and seed dispersed by winds because  
337 the most stressful conditions of temperature at higher altitudes.

338

339 In synthesis, the results point to an early succession with (i) a mosaic of pioneering-wind  
340 dispersed species, scattered survivors regrowing and spreading from biological legacies, and

341 plant species dispersed by frugivorous birds, likely favored by the biological legacies; (ii) the  
342 early succession is influenced by the interaction of the species-specific life history (including  
343 invasion by exotic species), altitudinal gradient and the different intensity of disturbance in a  
344 broad area.

345

346

### 347 **Acknowledgements**

348 Field work was financed by CONICYT PDA-24. A.L. and D.C. acknowledge support from  
349 grant CONICYT/FONDAP/15110009. RM acknowledge the scholarship DAAD/Becas Chile  
350 during late stages of this manuscript.

351

352

353

354

355

356

357

358

359

360

361

362

363

## 364 REFERENCES

365

366 Armesto, J. J., Rozzi, R., Miranda, P., & Sabag, C. (1987). Plant/frugivore interactions in South  
367 American temperate forests. *Revista Chilena de Historia Natural*, 60(2), 321-336.

368 Aravena, J.C., Carmona, M., Perez, C.A., Armesto, J.J., 2002. Changes in tree species  
369 richness, stand structure and soil properties in a successional chronosequences in northern  
370 Chiloé Island, Chile. *Revista Chilena de Historia Natural*. 75, 339-360.

371 Armesto, J.J., Arroyo, M.T.K., Villagran, C., 1996. *Ecología de los Bosques Nativos de*  
372 *Chile*. Editorial Universitaria, Chile. 470pp.

373 Armesto, J.J., Díaz, I.A., Papic, C., Willson, M.F., 2001. Seed rains of fleshy and dry  
374 propagules in different habitats in the temperate rainforest of Chiloé Island, Chile. *Austral*  
375 *Ecology* 26, 311-320.

376 Armesto, J.J., Pickett, S.T.A., 1991. Foreword. *Revista Chilena de Historia Natural* 644, 389.

377 Arroyo, M.T.K., P. Marquet, C. Marticorena, J. Simonetii, L. Cavieres, F.A. Squeo & R.  
378 Rozzi, 2004. Chilean winter rainfall-valdivian forests. In (Mittermeier, R.A., P. Robles Gil,  
379 M. Hoffmann, J. Pilgrim, T. Brooks, C. Goettsch, J. Lamoreux & G.A.B. da Fonseca, eds),  
380 "Hotspots Revisited", pp. 99-103. CEMEX, México.

381 Atmar, W., Patterson, B.D., 1993. The measure of order and disorder in the distribution of  
382 species in fragmented habitat. *Oecologia* 96, 373-382.

383 Atmar, W., Patterson. B.D., 1995. The nestedness temperature calculator: a visual basic  
384 program, including 294 presence-absence matrices. AICS Research, Inc., University Park,  
385 NM, and The Field Museum, Chicago.

386 Bellingham, P., Sparrow. A.D., 2000. Resprouting as a life-history strategy in woody plant  
387 communities. *Oikos* 89(2), 409-416.

388 Bond, W.J., Midgley, J.J., 2001. Ecology of sprouting in woody plants: the persistence niche.  
389 *Trends in Ecology & Evolution* 16(1), 45-51.

390 Bustamante-Sánchez, M.A., Armesto, J.J., Halpern, C.B., 2011. Biotic and abiotic controls on  
391 tree colonization in three early successional communities of Chiloé Island, Chile. *Journal of*  
392 *Ecology* 99(1), 288-299.

393 Chazdon, R.L., 2003. Tropical forest recovery: legacies of human impact and natural  
394 disturbances. *Perspective in Plant Ecology, Evolution and Systematics* 6, 51-71.

395 Colwell, R.K., Chao, A., Gotelli, N.J., Lin, S., Mao, C., Chazdon, R.L., Longino, J.T., 2012.  
396 Models and estimators linking individual-based and sample-based rarefaction, extrapolation  
397 and comparison of assemblages. *Journal of Plant Ecology* 5, 3-21.



- 398 Colwell, R.K., and Coddington, J.A., 1994. Estimating terrestrial biodiversity through  
399 extrapolation. *Phil. Trans. R. Soc. Lond. B* 345: 101-118.
- 400 Crews, T., Kitayana, K., Fownes, J., Riley, R., Herber, D., Mueller-Dombois, D., Vitousek,  
401 P., 1995. Changes in soil phosphorus fractions and ecosystem dynamics across a long  
402 chronosequence in Hawaii. *Ecology* 76: 1407-1424
- 403 Dale V.H., Swanson, F.J., Crisafulli, C.M., 2005. Ecological responses to the 1980 eruption  
404 of Mount St. Helens. Springer, 342pp.
- 405 del Moral, R. 1981. Initial life returns to Mount St. Helens. *Natural History* 90, 36-49.
- 406 del Moral, R., Grishim, S., 1999. Volcanic Disturbance and Ecosystem recovery, in: L.R.  
407 Walker (Ed.) *Ecosystem of disturbed Ground*. Elsevier, pp. 137-160.
- 408 Dinerstein, E., Olson, D., Graham, D., Webster, A., Primm, S., Bookbinder, M., Ledec, G.,  
409 1995. A conservation assessment of the terrestrial ecoregions of Latin America and the  
410 Caribbean. The International Bank for Reconstruccion and Development. Waschington, DC:  
411 The World Bank.
- 412 Donoso, C., 1993. *Bosques templados de Chile y Argentina, variación, estructura y dinámica*.  
413 Tercera edición. Editorial Universitaria, Santiago-Chile, 484p.
- 414 Donoso, C., 2006. *Las Especies arbóreas de los Bosques Templados de Chile y Argentina*.  
415 *Autoecología*. Marisa Cúneo Ediciones, Valdivia-Chile, 678p.
- 416 Donoso, C., Lara, A., 1999. *Silvicultura de los Bosques Nativos de Chile*. Editorial  
417 Universitaria, Santiago-Chile, 421p.  
418
- 419 Donoso PJ, Promis A (2013) *Silvicultura en Bosques Nativos. Avances en la investigación en*  
420 *Chile, Argentina y Nueva Zelandia. Estudios en Silvicultura de Bosques Nativos, Vol. 1*. Ed.  
421 Marisa Cuneo, Valdivia, Chile. p 253
- 422 Eriksson, O., 2000. Funtional roles of remnants plant population in communities and  
423 ecosystem. *Global Ecology and Biogeography* 9, 443-449.
- 424 Foster, D., Knight, D., Franklin, J.F., 1998. Landscape patterns and legacies resulting from  
425 Large, Infrequent forest disturbance. *Ecosystems* 1, 497-510.
- 426 Franklin, J.F., 1990. Biological Legacies: a critical Management concept from Mount St.  
427 Helens. *Transactions 55th North American Wildlife and Natural Resources Conference*, 216-219.
- 428 Franklin, J.F., Armesto, J.J., 1996. La retención de elementos estructurales del bosque durante  
429 la cosecha: Una alternativa de manejo para los bosques nativos chilenos. *Ambiente y*  
430 *Desarrollo* 12 (2), 69-79.
- 431 Franklin, J. F., MacMahon, J. A., Swanson, F. J., Sedell, J. R., 1985. Ecosystem responses to  
432 the eruption of Mount St. Helens. *National Geographic Research* 1:198-216.

- 433 Franklin, J.F., Mitchell, R.J., Palik, B.J., 2007. Natural disturbance and Stand development  
434 principles for ecological forestry. United States Department of agriculture, Forest Service,  
435 Northern Research Station. General Report NRS-19. 48p.
- 436 Franklin, J.F., Lindenmayer, D., MacMahon, J.A., McKee, A., Magnuson, J., Perry, D.A.,  
437 Waide, R., Foster, D., 2000. Threads of continuity: ecosystem disturbance, recovery, and the  
438 theory of biological legacies. *Conservation Biology in Practice* 1, 8-16.
- 439 Franklin, J.F., Spies, T.A., van Pelt, R., Carey, A., Thornburgh, D.A., Rae Berg, D.,  
440 Lindenmayer, D.B., Harmon, M.E., Keeton, W.S., Shaw, D.B., Bible, K., Chen, J., 2002.  
441 Disturbance and structural development of natural forest ecosystem with silvicultural  
442 implications, using Douglas-fir forest as an example. *Forest Ecology and Management* 155,  
443 399-423.
- 444 Franklin, J.R., Swanson, M.E., 2010. Long-term ecological research in the forest of the  
445 United States: key lessons for its application in Chile and around the world. *Revista Chilena*  
446 *de Historia Natural* 83, 185-194.
- 447 Gallardo, M.B., Pérez, C., Nuñez-Avila, M., Armesto, J.J. 2012. Desacoplamiento del  
448 desarrollo del suelo y la sucesión vegetal a lo largo de una cronosecuencia de 60 mil años en  
449 el volcán Llaima, Chile. *Revista Chilena de Historia Natural* 85: 291-306
- 450 Gotelli, N.J., Entsminger G.L., 2005. EcoSim: Null models software for ecology. Version 5.0.  
451 Acquired Intelligence Inc. & Kelsey-Bear.  
452 <http://homepages.together.net/~gentsmin/ecosim.htm>.  
453
- 454 Grosse, H. y Quiroz, I. 1999. Silvicultura de los bosques de segundo crecimiento de roble, raulí  
455 y coigüe en la región centro-sur de Chile. p 95-125. *Silvicultura de los bosques nativos de Chile*.  
456 Editorial Universitaria. 421p
- 457 Haberle, S.G., Szeicz, J.M., Bennett, K.D., 2000. Late Holocene vegetation dynamics and  
458 lake geochemistry at Laguna Miranda, XI Region, Chile. *Revista Chilena de Historia Natural*  
459 73, 655-669.
- 460 Johnson, E.A., Miyanishi, K., 2008. Testing the assumptions of chronosequences in  
461 succession. *Ecology Letters* 11: 419-431.
- 462 Kitzberger, T., Veblen, T.T, Villalba, R., 1995. Tectonic influences on tree growth in northern  
463 Patagonia, Argentina: the roles of substrate stability and climatic variation. *Canadian Journal*  
464 *of Forest Research* 25, 1684-1696
- 465 MacArthur, R.H., Wilson, E.O., 1967. *The theory of island biogeography*. Princeton  
466 University Press, Princeton
- 467 Major, J., Lara, L.E., 2013. Overview of Chaiten Volcano, Chile, and its 2008-2009 eruption.  
468 *Andean Geology* 40(2), 196-215.

- 469 McIntyre, S., Lavorel, S., Tremont, M., 1994. Plant Life-History Attributes: Their  
470 relationship to disturbance response in herbaceous vegetation. *Journal of Ecology* 83(1), 31-  
471 44.
- 472 McLachlan, S.M., Bazely, D.R., 2001. Recovery patterns of understory herbs and their use  
473 as indicators of deciduous forest regeneration. *Conservation Biology* 15, 98-110.
- 474 Müller-Dombois, D., Ellenberg, H., 1974. Aims and methods in vegetation ecology. The  
475 Blackburn Press. 580p.
- 476 Myers, N., Mittermeier, R.A., Mittermeier, C.G., da Fonseca, A.B., Kent, J., 2000.  
477 Biodiversity hotspot for conservation priorities. *Nature*, 402, 853-58.
- 478 Lara, L.E., 2009. The 2008 eruption of the Chaitén Volcano, Chile: a preliminary report.  
479 *Andean Geology* 36(1), 125-129.
- 480 Lindenmayer, D.B., Franklin, J.F., 2002. *Conserving Forest Biodiversity: A Comprehensive*  
481 *Multiscaled Approach*. Island Press, Washington, 351p.
- 482 Luebert, F., Pliscoff, P., 2006. *Sinopsis bioclimática y vegetacional de Chile*. Editorial  
483 Universitaria, Santiago-Chile, 316p.
- 484 Pausas, J.G., Lavorel, S., 2003. A hierarchical deductive approach for functional types in  
485 disturbed ecosystem. *Journal of Vegetation Sciences* 14(3): 409-416.
- 486 Peet, R., 1992. Community structure and ecosystem function, in: Glenn-Lewin D., Peet R.,  
487 Veblen, T. (Eds.), *Plant succession theory and prediction*. Chapman & Hall, London, pp. 103-  
488 151.
- 489 Perakis, S.S., Hedin L., 2002. Nitrogen loss from unpolluted South American forest mainly  
490 via dissolved organic compounds. *Nature* 415, 416-419.
- 491 Pickett, S.T.A., Collins, S.L., Armesto, J.J., 1987. Models, mechanism and pathways of  
492 succession. *The Botanical Review* 53(3), 335-371.
- 493 Pickett, S.T.A., 1988. Space-for-time substitution as an alternative to long term studies, in:  
494 Likens, G.E. (Ed.), *Long-term Studies in Ecology*. Springer, New York, NY, pp. 110–135.
- 495 Robock, A., Oppenheimer, C., 2003. *Volcanoes and Earth's Atmosphere*. Geophysical  
496 monograph 139.
- 497 Runkle, J.R., 1985. Disturbance regimes in temperate forests, in: Pickett, S.T.A., White, P.S.  
498 (Eds.), *The Ecology of Natural Disturbance and Patch Dynamics*. Academic Press, Orlando,  
499 FL, pp. 17-33
- 500 Stern, C.R., 2004. Active Andean volcanism: its geologic and tectonic setting. *Andean*  
501 *Geology*. 31(2), 161-206

- 502 Swanson, F., Franklin, J., 1992. New Forestry principles from ecosystem analysis of Pacific  
503 Northwest Forest. *Ecological applications* 2(3), 262-274
- 504 Swanson, F., Jones, J., Crisafulli, Ch., Lara A., 2013. Effects of volcanic and hydrology  
505 processes on forest vegetation: Chaiten Volcano, Chile. *Andean Geology* 40(2), 359-391
- 506 Swanson, M., Franklin, J., Beschta, R., Crisafulli, C., DellaSala, D., Hutto, R., Lindenmayer,  
507 D., Swanson, F., 2011. The Forgotten stage of forest succession: Early-successional  
508 ecosystems on forest site. *Biological Sciences Faculty Publications*. Paper 278.  
509 [http://scholarworks.s.umt.edu/biosci\\_pubs/278](http://scholarworks.s.umt.edu/biosci_pubs/278)
- 510 Tilman D., 1997. Community invasibility, recruitment limitation, and grassland biodiversity.  
511 *Ecology* 78, 81–92
- 512 Turner, M., Dale, V., 1998. Comparing large, infrequent disturbance: what have we learned?.  
513 *Ecosystem* 1, 493-496.
- 514 Turner, M., Dale, M., Everham, E., 1997. Fires, hurricanes, and volcanoes: Comparing large  
515 disturbances. *BioSciences* 47(11), 758-768.
- 516 Veblen, T.T., 1985. Stand dynamics in Chilean *Nothofagus* forest, in: Pickett, S.T.A., White,  
517 P.S. (Eds.), *The ecology of natural disturbance and patch dynamics*. Academic Press,  
518 Orlando, FL, pp 35-51.
- 519 Veblen, T.T., Ashton, D.H., 1978. Catastrophic influences on the vegetation of the Valdivian  
520 Andes, Chile. *Vegetatio* 36(3): 149-167.
- 521 Veblen, T.T., Ashton, D.H., Schlegel, F., Veblen, A., 1977. Plant succession in a timberline  
522 depressed by vulcanism in South-Central Chile. *Journal of Biogeography* 4: 275-294.
- 523 Veblen, T.T., Donoso, C., 1987. Alteración natural y dinámica regenerativa de las especies  
524 chilenas de *Nothofagus* de la Región de Los Lagos. *Bosque* 8(2), 132-142.
- 525 Veblen, T.T., Donoso, C., Kitzberger, T., Rebertus, A.J., 1996. Ecology of southern Chilean  
526 and Argentinean *Nothofagus* forests, in: Veblen T.T., Hill, R.S., Read, J., (Eds.) *The ecology  
527 and biogeography of Nothofagus forests*. Yale University Press, New Haven, Connecticut,  
528 USA, pp. 293-353
- 529 Veblen, T.T., Donoso, C., Schlegel, F., Escobar, B., 1981. Forest dynamics in South-Central  
530 Chile. *Journal of Biogeography* 8, 211-247.
- 531 Veblen, T.T., Schlegel, F., Oltremari, J., 1983. Temperate broad-leaved evergreen forest of  
532 South America, in: Ovington, J.D., (Ed.) *Temperate broad-leaved evergreen forest*. Elsevier,  
533 Amsterdam, pp 5-31.
- 534 Villagran, C., Hinojosa, F., 1997. Historia de los Bosques Templados de Sudamerica, II:  
535 Análisis fitogeográfico. *Revista Chilena de Historia Natural*, 70, 241-267.

536 Willson, M.F., De Santo, T. L., Sabag, C. E., Armesto, J.J., 1996. Avian communities in  
537 temperate rainforest of North and South America. In: Lawford, R., Alaback, P. B., Fuentes,  
538 E., (Eds.) High-latitude rainforests and associated ecosystems of the west coast of the  
539 Americas. Springer, New York. pp. 228–247
